# Supplementary material for: Transcriptome and Multivariable Data Analysis of Corynebacterium glutamicum under Different Dissolved Oxygen Conditions in Bioreactors
Source: PLOS journal article supplement (doi:10.1371/journal.pone.0167156), 2016-12-01
Supplement: S5 (10.1371/journal.pone.0167156.s005) [file journal.pone.0167156.s005]

S2 Table The correlation values and average CV among biological replicates

| DO concentration | Correlation value | CV(%) |
| --- | --- | --- |
| 50% OD | 0.95 | 2.41 |
| 30% OD | 0.95 | 1.22 |
| 0% OD | 0.99 | 1.17 |
